# Supplementary material for: Self-assembly of affinity-controlled nanoparticlesviahost–guest interactions for drug delivery
Source: Royal Society of Chemistry journal article supplement (doi:10.1039/c8nr01518j), 2018-01-01
Supplement: c8nr01518j1.pdf [file c8nr01518j1.pdf]

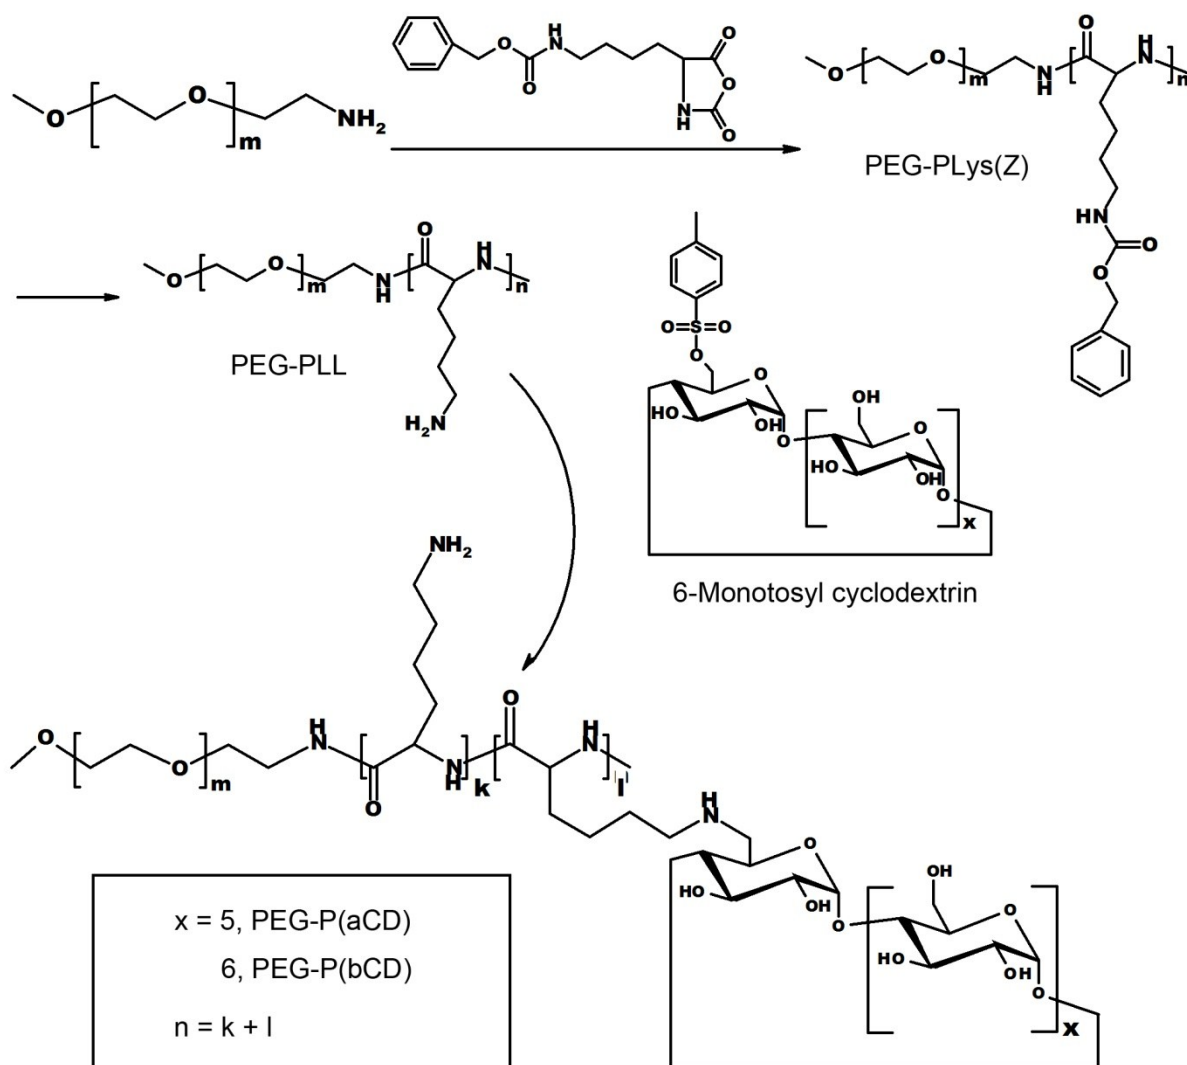

**Figure S1.** Schematic illustration of the synthesis of CD-containing hydrophilic diblock copolymers. PEG-P(aCD) and PEG-P(bCD) indicate copolymers containing  $\alpha$ -CD and  $\beta$ -CD, respectively.

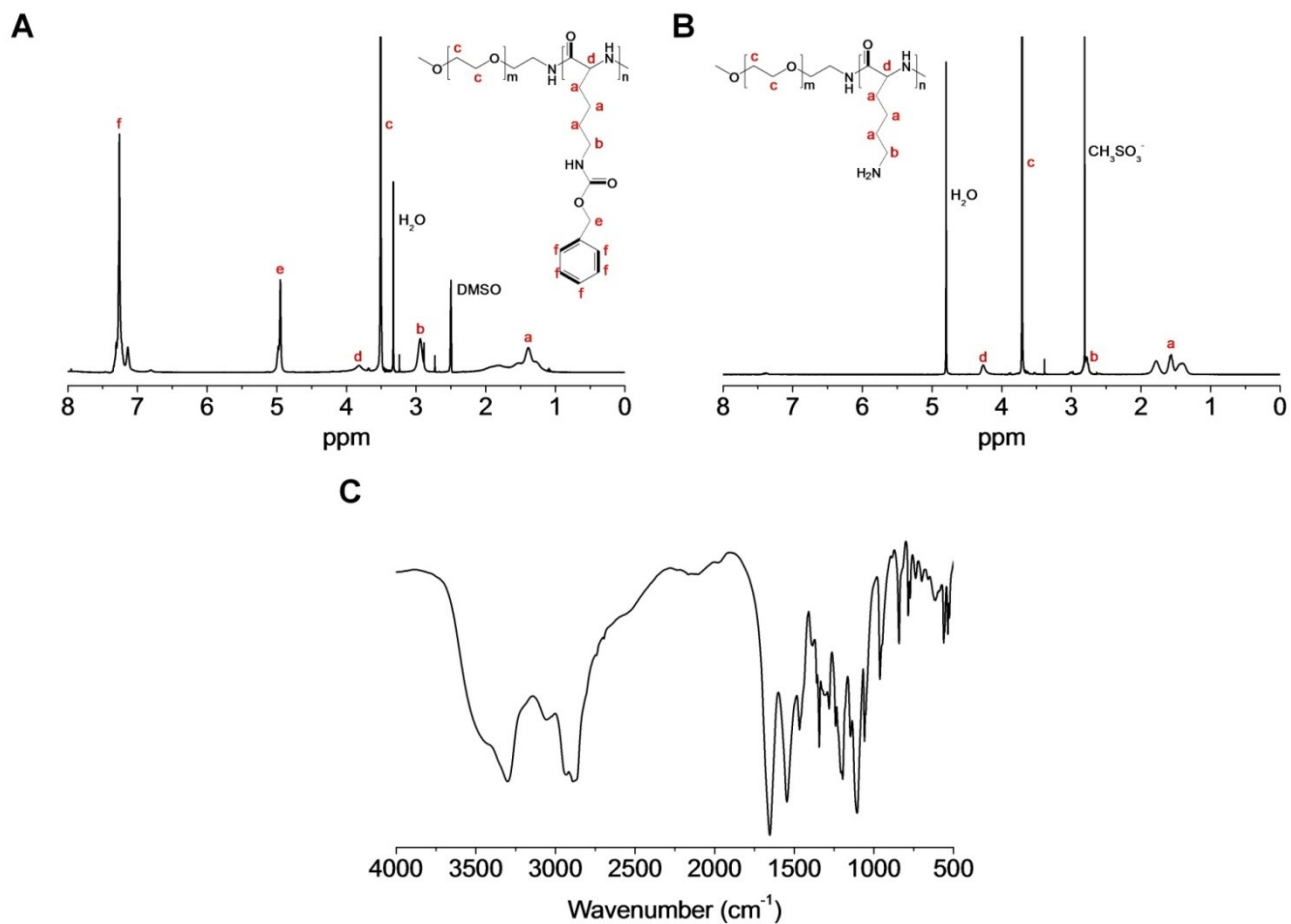

**Figure S2.** Characterization of synthesized PEG-PLL. (A-B)  $^1\text{H}$  NMR spectra of PEG-PLys(Z) (A) and PEG-PLL (B). (C) The FT-IR spectrum of PEG-PLL.

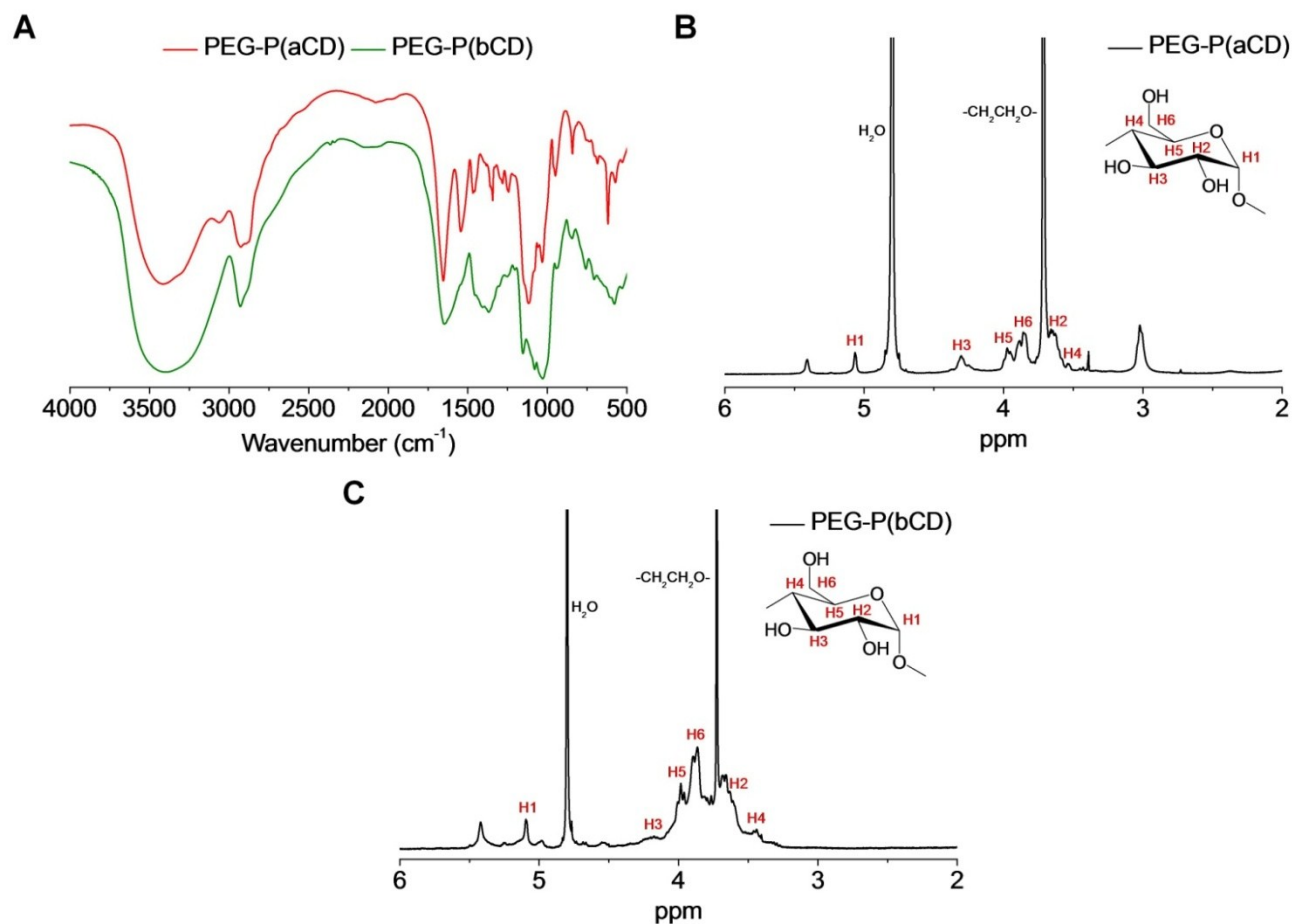

**Figure S3.** Characterization of synthesized CD-containing copolymers PEG-P(aCD) and PEG-P(bCD). (A) The FT-IR spectra of PEG-P(aCD) and PEG-P(bCD). (B-C) The  $^1\text{H}$  NMR spectra of PEG-P(aCD) (B) and PEG-P(bCD) (C).

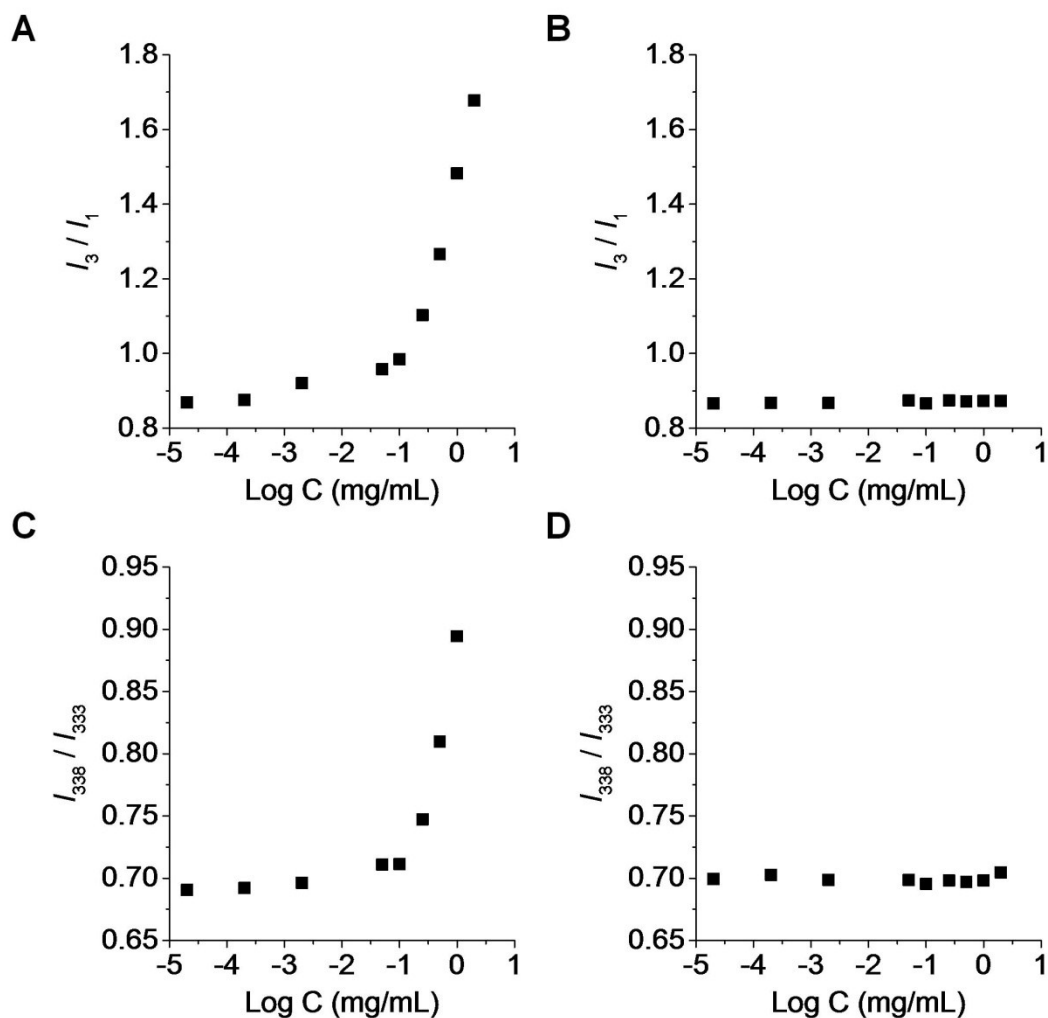

**Figure S4.** Fluorescence spectroscopy studies of self-assembly behaviors of PEG-P(aCD) in the presence of a fluorescent probe pyrene. (A-B) Plot of fluorescence intensity ratios of the third band ( $I_3$ , at 385 nm) to the first band ( $I_1$ , at 375 nm) in emission fluorescence spectra of pyrene in the presence of PEG-P(aCD) (A) or  $\alpha$ -CD (B) at various concentrations. (C-D) The fluorescent intensity ratios ( $I_{338}/I_{333}$ ) at 338 and 333 nm of excitation spectra of pyrene in aqueous solutions containing various concentrations of PEG-P(aCD) (C) or  $\alpha$ -CD (D).
